# Supplementary material for: A Method to Predict Rock Fracture with Infrared Thermography Based on Heat Diffusion Analysis
Source: Hindawi journal article supplement (doi:10.1155/2021/6669016), 2021-02-27
Supplement: f1 [file 6669016.f1.docx]

**Supplemental File**

1. 14Mpa





Fig 1 AIRT increment/stress-time under 14Mpa in region C1~C5





Fig 2 AIRT increment/stress-time under 14Mpa in region C6~C10





Fig 3 AIRT increment/stress-time under 14Mpa in region C11~C15





Fig 4 AIRT increment/stress-time under 14Mpa in region C16~C20





Fig 5 AIRT increment/stress-time under 14Mpa in region C21~C25

1. 22Mpa





Fig 6 AIRT increment/stress-time under 22Mpa in region C1~C5





Fig 7 AIRT increment/stress-time under 22Mpa in region C6~C10





Fig 8 AIRT increment/stress-time under 22Mpa in region C11~C15





Fig 9 AIRT increment/stress-time under 22Mpa in region C16~C20





Fig 10 AIRT increment/stress-time under 22Mpa in region C21~C25

1. 30Mpa





Fig 11 AIRT increment/stress-time under 30Mpa in region C1~C5





Fig 12 AIRT increment/stress-time under 30Mpa in region C6~C10





Fig 13 AIRT increment/stress-time under 30Mpa in region C11~C15





Fig 14 AIRT increment/stress-time under 30Mpa in region C16~C20





Fig 15 AIRT increment/stress-time under 30Mpa in region C21~C25
